# Supplementary material for: Hemocompatibility of biogenic phosphorus nano-agromaterials at environmentally relevant and supra-environmental concentrations for occupational exposure
Source: Royal Society of Chemistry journal article supplement (doi:10.1039/d2va00237j), 2022-12-20
Supplement: d2va00237j1.pdf [file d2va00237j1.pdf]

**Electronic Supplementary Information**

**Hemocompatibility of biogenic phosphorus nano-agromaterials at environmentally  
relevant and supra-environmental concentrations for occupational exposure**

Ayushi Priyam <sup>a, b</sup>, Luis O.B. Afonso <sup>b</sup>, Aaron G. Schultz <sup>b</sup>, Amit Kumar Dinda <sup>c</sup>, Pushplata

Prasad Singh <sup>a, b</sup> \*

*<sup>a</sup> National Centre of Excellence for Advanced Research in Agricultural Nanotechnology,  
TERI - Deakin Nanobiotechnology Centre, Sustainable Agriculture Division, The Energy and  
Resources Institute (TERI), DS Block, India Habitat Centre, Lodhi Road, New Delhi, 110003,  
India*

*<sup>b</sup> School of Life and Environmental Sciences, Deakin University, Geelong, Victoria, 3217,  
Australia.*

*<sup>c</sup> Department of Pathology, All India Institute of Medical Sciences, Ansari Nagar, New Delhi,  
110029, India*

**Correspondence: [pushplata.singh@teri.res.in](mailto:pushplata.singh@teri.res.in)**

**1. Phosphorus – based nanomaterials (P-Based NMs) used in the study:  
origin/synthesis, characterizations and properties.**

We used four different types of nanohydroxyapatites (nHAPs) and one nanophosphorus (nP) variant derived from rock phosphate (RP). These nanomaterials (NMs) were thoroughly characterized using different physicochemical techniques (**ESI table 1**). The NMs were characterized in their pristine form. 1mg.mL<sup>-1</sup> of each of these NMs were prepared in de-ionized water and characterized for shape and size using Scanning Electron Microscope (EVO, MA10, Carl Zeiss, Oberkochen, Germany) and TEM (Tecnai G2 30-U twin microscope, FEI, Thermo Fisher Scientific, Waltham, Massachusetts, USA) at voltage of 200 kV. To measure the hydrodynamic diameter and zeta potential, NMs were freshly prepared in de-ionized water (1mg.mL<sup>-1</sup>) and sonicated for 30 min before being measured by dynamic light scattering (DLS) (Zetasizer Nano-ZS, Malvern, UK). The elemental composition for Ca and P was determined from AAS (iCE 3000 AA05123903 v1.30, ThermoFisher Scientific, USA) and ICP/MS (ICP-MS 7900 with UHMI, Agilent technologies, California, USA). For functional group identification, sample analysis was performed on Thermofisher FTIR spectrometer with FIR attachment at ATR mode (Nicolet iS50 FTIR Tri-detector, Thermo Fisher Scientific, Waltham, Massachusetts, USA) at room temperature in the range of 4000-400 cm<sup>-1</sup> with 100 scans per sample. The synthesized particles were also characterized by X-ray diffraction (XRD). Powder XRD spectra were recorded at room temperature, using Bruker, D8 discover high resolution X-ray diffractometer (Bruker, Billerica, Massachusetts, USA) with Cu K $\alpha$  = 1.5406 Å, 3 kW as radiation source operating at 40 kV and 40 mA. The diffraction patterns were collected over a 2 $\theta$  range from 20° to 90° with an incremental step size of 0.02° using flat plane geometry. The acquisition time was set at 2 seconds for each scan. The heat capacity and thermal stability of nP and nHAP (biologically synthesized and commercially available) were assessed by differential scanning calorimetry (DSC-60,

Shimadzu, Kyoto, Japan) where 2 mg of dried sample was first crimped in the aluminum pan and the sealed pan was then loaded to DSC analyzer for analysis from 25°C - 550°C.

**ESI Table 1.** Phosphorus – based nanomaterials (P-Based NMs) used in the study: origin/synthesis, characterizations and properties.

|                                         | nHAP_B <sup>1</sup>                                                                                                                                    | nHAP_C                                | nHAP_Sigma                | nHAP_SRL                             | nP                                                |
|-----------------------------------------|--------------------------------------------------------------------------------------------------------------------------------------------------------|---------------------------------------|---------------------------|--------------------------------------|---------------------------------------------------|
| Origin/Synthesis                        | Biosynthesis                                                                                                                                           | Chemical synthesis                    | Commercial (SigmaAldrich) | Commercial (SRL Pvt. Ltd.)           | Biosynthesis                                      |
| Shape                                   | Platelet                                                                                                                                               | Rod                                   | Sphere                    | Needle                               | Dots                                              |
| Size by electron microscope [nm ± S.D.] | 35.74 ± 11.65                                                                                                                                          | L = 83.92 ± 17.98<br>W = 26.85 ± 3.74 | 33.9 ± 8.6                | L = 64.64 ± 4.33<br>W = 14.01 ± 1.26 | ~5-10 nm                                          |
| Hydrodynamic size [nm ± S.D.]           | 325.8 ± 37.1                                                                                                                                           | 756.2 ± 28.8                          | 874.3 ± 51.5              | 892.8 ± 21.1                         | 798.5 ± 23.36                                     |
| Zeta potential [mV ± S.D.]              | -31.3 ± 3.5                                                                                                                                            | -45.2 ± 1.7                           | -10.3 ± 0.3               | -9.7 ± 0.9                           | -11.61 ± 0.01                                     |
| Ca to P ratio                           | ~1.6                                                                                                                                                   | ~1.6                                  | ~1.6                      | ~1.6                                 | ~3.8                                              |
| FTIR peaks                              | Stretching and bending peaks for PO <sub>4</sub> <sup>3-</sup> and CO <sub>3</sub> <sup>2-</sup> . Absorption peak for CO <sub>3</sub> <sup>2-</sup> . |                                       |                           |                                      |                                                   |
| XRD peaks                               | apatite                                                                                                                                                | apatite                               | apatite                   | apatite                              | Tri calcium phosphate and calcium penta-phosphate |
| DSC peaks (25°C - 550°C)                | No peak                                                                                                                                                | No peak                               | No peak                   | No peak                              | 451.66 with heat: - 49.4mJ                        |

53

## 2. Statistical analysis of blood contact properties: hemolysis, blood cell aggregation assay and plasma coagulation time

The overall effect on hemolysis, blood cell aggregation and plasma coagulation time after exposure to biologically synthesized nHAP (nHAP\_B), chemically synthesized nHAP (nHAP\_C), SigmaAldrich nHAP (nHAP\_Sigma), SRL nHAP (nHAP\_SRL), nanophosphorous (nP), rock phosphate bulk control (RP), and calcium phosphate bulk control (Ca<sub>3</sub>PO<sub>4</sub>), were subjected to ANOVA to check if the overall variance was significant. This would not

60

61 explicitly tell where the significant differences lie and was thus, then followed by a Tukey  
62 post hoc multiple comparison test, to identify the treatment groups with significant difference  
63 in mean values. A p-value less than 0.05 was considered as statistically significant.

64

|                                                    | nHAP_B<br>(Platelet) | nHAP_C<br>(Rod) | nHAP_Sigma<br>(Spherical) | nHAP_SRL<br>(Needle) | nP (Dots) | Ca <sub>3</sub> PO <sub>4</sub><br>(Bulk<br>material) | RP (Bulk<br>material) |
|----------------------------------------------------|----------------------|-----------------|---------------------------|----------------------|-----------|-------------------------------------------------------|-----------------------|
| nHAP_B<br>(Platelet)                               | -                    |                 |                           |                      |           |                                                       |                       |
| nHAP_C<br>(Rod)                                    | <0.0001              | -               |                           |                      |           |                                                       |                       |
| nHAP_Sigma<br>(Spherical)                          | 0.0479               | <0.0001         | -                         |                      |           |                                                       |                       |
| nHAP_SRL<br>(Needle)                               | <0.0001              | <0.0001         | <0.0001                   | -                    |           |                                                       |                       |
| nP (Dots)                                          | <0.0001              | <0.0001         | 0.0002                    | <0.0001              | -         |                                                       |                       |
| Ca <sub>3</sub> PO <sub>4</sub> (Bulk<br>material) | <0.0001              | <0.0001         | <0.0001                   | <0.0001              | <0.0001   | -                                                     |                       |
| RP (Bulk<br>material)                              | <0.0001              | <0.0001         | <0.0001                   | <0.0001              | <0.0001   | <0.0001                                               | -                     |

Legend:

- p>0.05
- p<0.05
- p<0.01
- p<0.001
- p<0.0001

65 **ESI Figure 1.** P-value orthogonal matrix evaluated using Tukey's multiple comparisons test  
66 between different NMs and bulk materials for the effects of their concentration on hemolysis.  
67 The colour gradient (figure inset) denotes different levels of significance.

68

|                                                    | nHAP_B<br>(Platelet) | nHAP_C<br>(Rod) | nHAP_Sigma<br>(Spherical) | nHAP_SRL<br>(Needle) | nP (Dots) | Ca <sub>3</sub> PO <sub>4</sub><br>(Bulk<br>material) | RP (Bulk<br>material) |
|----------------------------------------------------|----------------------|-----------------|---------------------------|----------------------|-----------|-------------------------------------------------------|-----------------------|
| nHAP_B<br>(Platelet)                               | -                    |                 |                           |                      |           |                                                       |                       |
| nHAP_C<br>(Rod)                                    | >0.9999              | -               |                           |                      |           |                                                       |                       |
| nHAP_Sigma<br>(Spherical)                          | >0.9999              | >0.9999         | -                         |                      |           |                                                       |                       |
| nHAP_SRL<br>(Needle)                               | >0.9999              | >0.9999         | >0.9999                   | -                    |           |                                                       |                       |
| nP (Dots)                                          | >0.9999              | >0.9999         | >0.9999                   | >0.9999              | -         |                                                       |                       |
| Ca <sub>3</sub> PO <sub>4</sub> (Bulk<br>material) | >0.9999              | >0.9999         | >0.9999                   | >0.9999              | >0.9999   | -                                                     |                       |
| RP (Bulk<br>material)                              | 0.9998               | 0.9998          | 0.9998                    | 0.9998               | 0.9998    | 0.9998                                                | -                     |

Legend:

- p>0.05
- p<0.05
- p<0.01
- p<0.001
- p<0.0001

ESI Figure 2. P-value orthogonal matrix evaluated using Tukey's multiple comparisons test between different NMs and bulk materials for the effects of their concentration on blood cell aggregation. The colour gradient (figure inset) denotes different levels of significance.

|                                                 | nHAP_B<br>(Platelet) | nHAP_C<br>(Rod) | nHAP_Sigma<br>(Spherical) | nHAP_SRL<br>(Needle) | nP (Dots) | Ca <sub>3</sub> PO <sub>4</sub><br>(Bulk material) | RP (Bulk material) |
|-------------------------------------------------|----------------------|-----------------|---------------------------|----------------------|-----------|----------------------------------------------------|--------------------|
| nHAP_B<br>(Platelet)                            | -                    |                 |                           |                      |           |                                                    |                    |
| nHAP_C<br>(Rod)                                 | <0.0001              | -               |                           |                      |           |                                                    |                    |
| nHAP_Sigma<br>(Spherical)                       | <0.0001              | <0.0001         | -                         |                      |           |                                                    |                    |
| nHAP_SRL<br>(Needle)                            | <0.0001              | <0.0001         | <0.0001                   | -                    |           |                                                    |                    |
| nP (Dots)                                       | <0.0001              | <0.0001         | >0.9999                   | <0.0001              | -         |                                                    |                    |
| Ca <sub>3</sub> PO <sub>4</sub> (Bulk material) | <0.0001              | <0.0001         | <0.0001                   | <0.0001              | <0.0001   | -                                                  |                    |
| RP (Bulk material)                              | <0.0001              | <0.0001         | <0.0001                   | <0.0001              | <0.0001   | <0.0001                                            | -                  |

■ p>0.05  
 ■ p<0.05  
 ■ p<0.01  
 ■ p<0.001  
 ■ p<0.0001

ESI Figure 3. P-value orthogonal matrix evaluated using Tukey's multiple comparisons test between different NMs and bulk materials for the effects of their concentration on plasma coagulation time. The colour gradient (figure inset) denotes different levels of significance.

ESI Table 2. Statistical significance values between protein content determined from different washes (W1, W2 and W3) and the hard corona (HC). The p values for each of the comparison was determined by Tukey's multiple comparison test.

| Tukey's multiple comparisons test | Statistical significance summary | P value |
|-----------------------------------|----------------------------------|---------|
| nHAP B                            |                                  |         |
| W1 vs. W2                         | Not significant                  | 0.0949  |
| W1 vs. W3                         | ****                             | <0.0001 |
| W1 vs. HC                         | ****                             | <0.0001 |
| W2 vs. W3                         | ***                              | 0.0008  |
| W2 vs. HC                         | ****                             | <0.0001 |
| W3 vs. HC                         | Not significant                  | 0.5530  |
| nHAP C                            |                                  |         |
| W1 vs. W2                         | Not significant                  | 0.0982  |
| W1 vs. W3                         | ***                              | 0.0002  |
| W1 vs. HC                         | ****                             | <0.0001 |
| W2 vs. W3                         | Not significant                  | 0.1290  |

|            |                 |         |
|------------|-----------------|---------|
| W2 vs. HC  | ****            | <0.0001 |
| W3 vs. HC  | *               | 0.0329  |
| nHAP_Sigma |                 |         |
| W1 vs. W2  | Not significant | 0.0517  |
| W1 vs. W3  | ****            | <0.0001 |
| W1 vs. HC  | ****            | <0.0001 |
| W2 vs. W3  | ****            | <0.0001 |
| W2 vs. HC  | ****            | <0.0001 |
| W3 vs. HC  | Not significant | 0.9612  |
| nHAP_SRL   |                 |         |
| W1 vs. W2  | ****            | <0.0001 |
| W1 vs. W3  | ****            | <0.0001 |
| W1 vs. HC  | ****            | <0.0001 |
| W2 vs. W3  | ***             | 0.0009  |
| W2 vs. HC  | ****            | <0.0001 |
| W3 vs. HC  | Not significant | 0.6044  |
| nP         |                 |         |
| W1 vs. W2  | Not significant | 0.0699  |
| W1 vs. W3  | ****            | <0.0001 |
| W1 vs. HC  | ****            | <0.0001 |
| W2 vs. W3  | *               | 0.0204  |
| W2 vs. HC  | **              | 0.0013  |
| W3 vs. HC  | Not significant | 0.7586  |

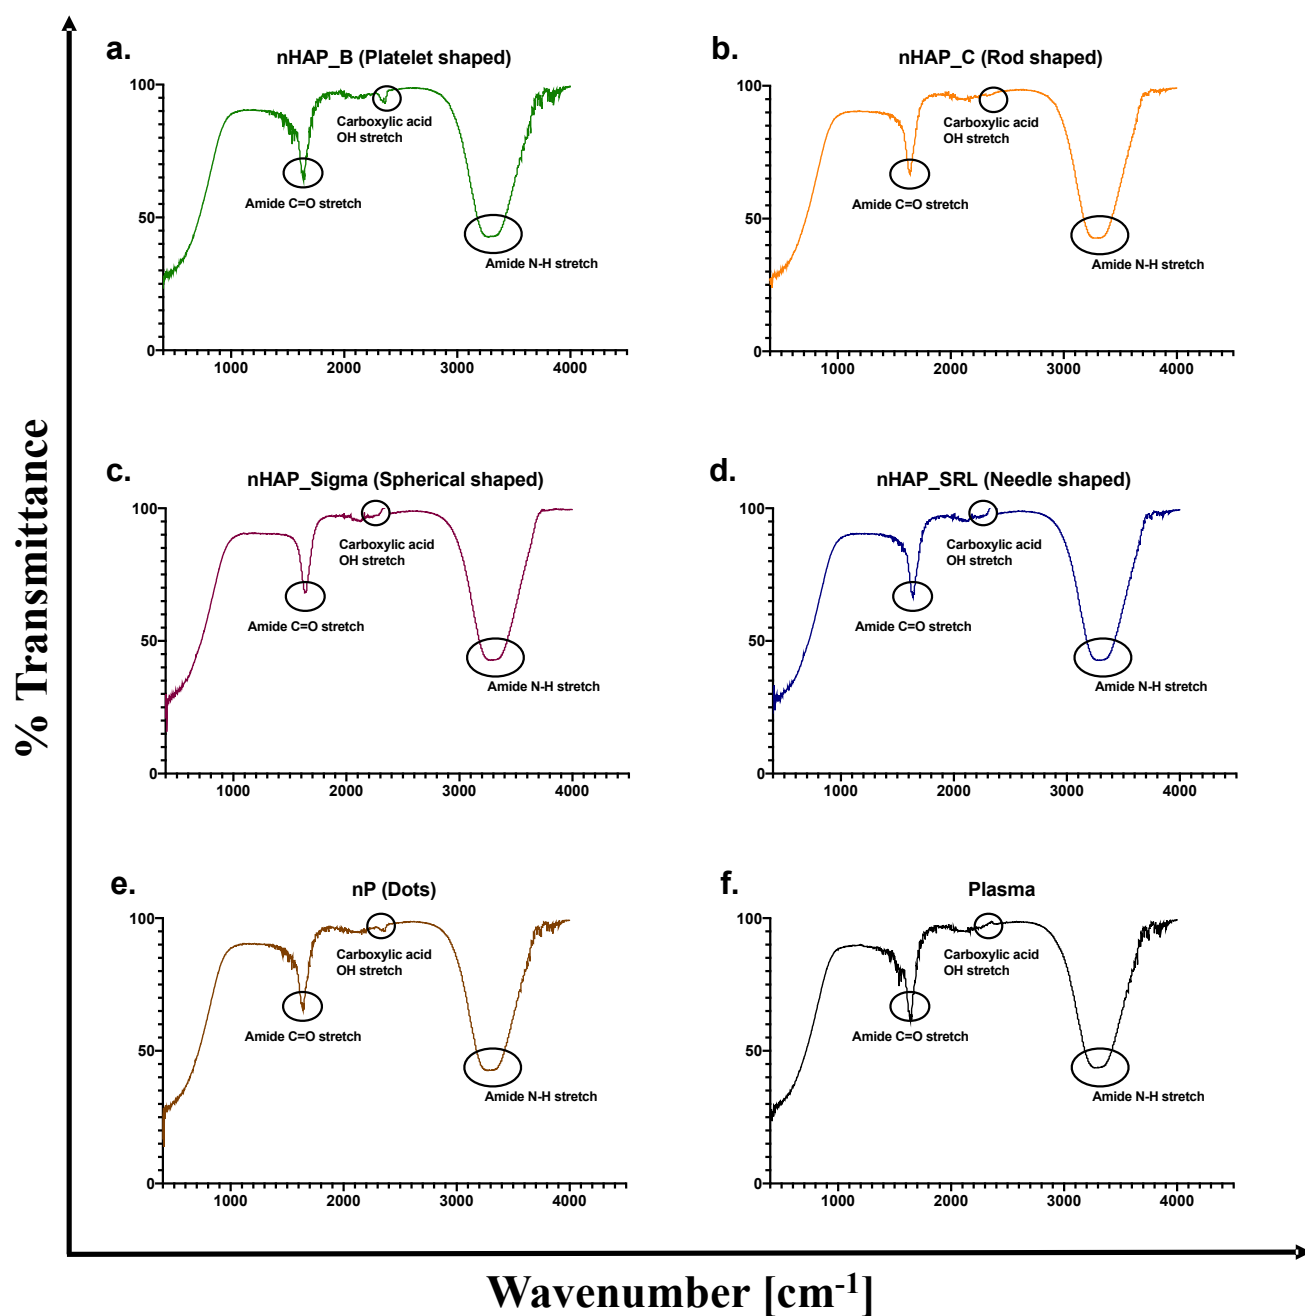

ESI Figure 4. FTIR spectra for hard corona on a. biologically synthesized nHAP (nHAP\_B), b. chemically synthesized nHAP (nHAP\_C), c. SigmaAldrich nHAP (nHAP\_Sigma), d. SRL nHAP (nHAP\_SRL), e. nanophosphorous (nP) and f. only plasma. Peaks at wavenumbers 1650, 2360 - 2370 and 3270 – 3380 cm<sup>-1</sup> denote presence of amide C=O stretch, carboxylic acid OH stretch and amide N-H stretch respectively.

#### Reference:

1. Priyam, A.; Das, R. K.; Schultz, A.; Singh, P. P., A new method for biological synthesis of agriculturally relevant nanohydroxyapatite with elucidated effects on soil bacteria. *Scientific reports* **2019**, 9 (1), 1-14.
